# Supplementary material
Source: PubMed Central journal article supplement (PMC6263037)
Supplement: NIHMS989091-supplement-s2.pdf [file NIHMS989091-supplement-s2.pdf]

### Phosphoinositides as membrane compartmental identifiers

Phosphoinositides regulate membrane traffic, define organelle identity and mediate signal transduction. Different phosphoinositides map to the membranes of different organelles<sup>1-4</sup>, in relative amounts that reflect the activities of organelle-associated phosphoinositide synthases and specific inositol kinases and phosphatases. In endocytic traffic, PtdIns(4,5)P<sub>2</sub> marks the plasma membrane, and PtdIns3P and PtdIns4P mark distinct endosomal compartments<sup>3,4</sup>. Early genetic studies in yeast showed that generation of PtdIns3P by an endosomal phosphatidylinositol 3-kinase, Vps34, is a determinant of compartmental identity in membrane traffic<sup>5,6</sup>, while leaving open the question of where and with what timing phosphoinositide conversion occurs.

Endocytic proteins modulate coat assembly and cargo selection, membrane deformation and scission, vesicle translocation and fusion. That many of these proteins interact *in vitro* with PtdIns(4,5)P<sub>2</sub>, PtdIns3P, PtdIns4P and PtdIns(3,4)P<sub>2</sub> suggests interconversion of phosphoinositides along the routes of endocytic traffic. A connection between PtdIns(4,5)P<sub>2</sub> and an endocytic protein was first shown for AP2, the endocytic clathrin adaptor, which binds PtdIns(4,5)P<sub>2</sub> selectively<sup>7</sup>. Acute depletion of PtdIns(4,5)P<sub>2</sub> blocks association of cytosolic AP2 with the plasma membrane, prevents coated pit initiation and stalls partially formed coated pits<sup>8,9</sup>. Other endocytic proteins such as dynamin, epsin, eps15, and SNX9 bind phosphoinositides *in vitro*, but their low affinity and relative promiscuity have made the specificity of their lipid interactions difficult to establish<sup>10-14</sup>.

A particularly important characteristic of a phosphoinositide compartmental identifier in vesicular membrane traffic is that the onset of any modification that can be detected experimentally or functionally marks the separation of the vesicle from the parent membrane. The modified lipid can no longer diffuse from the budded carrier, nor can the lipid identifier of the parent membrane replace it, and components such as auxilin can then sense vesicle closure, even tens of nanometers from the point of scission.

### Clathrin-coat specific phosphoinositide sensors

Auxilin1 (Aux1) has a phosphoinositide binding N-terminal PTEN-like domain, a central clathrin-binding region, and a C-terminal, Hsc70 binding J-domain (Fig. 1a)<sup>15,16</sup>. A burst of auxilin1 and auxilin2/GAK recruitment immediately after closure of an endocytic clathrin-coated vesicle at the plasma membrane determines the onset of uncoating<sup>15,16</sup> (Extended Data Fig. 1a, Supplementary Video 1). Partial or complete removal of the PTEN-like domain<sup>15-17</sup> (Extended Data Fig. 1a,

Supplementary Video 1) or mutation of its lipid binding surface<sup>17</sup> eliminates recruitment, but the J-domain is dispensable for this initial auxilin association with the clathrin lattice<sup>15,16</sup> (Extended Data Fig. 1a). A number of other proteins with functions completely unrelated to auxilin or to clathrin-coat dynamics bind specific phosphoinositides through interactions mediated by lipid-binding domains of similar size but of structure unrelated to that of the Aux1 PTEN-like domain. We created live-cell imaging sensors by replacing the PTEN-like domain of EGFP-Aux1 with other domains of defined phosphoinositide specificity (Fig. 1a, Extended Data Fig. 1j), causing recruitment of the modified Aux1 chimeras to coated pits or coated vesicles depending on the phosphoinositide composition of the underlying membrane.

We verified that all the Aux1-based sensors of defined lipid binding specificity interacted with the correct phosphoinositides in membrane strips (Extended Data Fig. 3a). We also verified that expression of the Aux1-based sensors at the relatively low levels used in the experiments had no detectable effect on clathrin-coated pit dynamics (Extended Data Fig. 3b) and clathrin-mediated transferrin uptake (Extended Data Fig. 3c). Moreover, the recruitment properties of the Aux1-based sensors were the same in cells stably (Extended Data Fig. 4b) or transiently expressing them (Fig. 2) and also in other cell types such as monkey COS-7 and human dermal fibroblasts<sup>18,19</sup> (Extended Data Fig. 4c, d). Chimeric proteins with the clathrin-binding domain of epsin1 fused to various lipid-binding domains in place of the epsin1 ENTH domain confirmed the coincidence detection principle embodied in our Aux1-based constructs (Extended Data Fig. 4e).

We showed that recruitment of the PtdIns(4,5)P<sub>2</sub> sensor did not require a proposed dynamin-binding region between the PTEN-like domain and the clathrin-binding domain, but only a linker from Dishevelled2<sup>20</sup> long enough to bridge the ~100 Å gap between the clathrin lattice and the lipid headgroup layer (Extended Data Fig. 1c-i), so that the sensor can make both lipid and clathrin contacts at the same time. Finally, we saw unaltered recruitment of the PtdIns(4,5)P<sub>2</sub> sensor to coated pits when we used a mutant of the phosphatase module of OCRL unable to hydrolyze PtdIns(4,5)P<sub>2</sub> (Extended Data Fig. 2c).

In the main text of this paper, we describe sensors for PtdIns3P, PtdIns4P, PtdIns(4,5)P<sub>2</sub>, and PtdIns(3,4)P<sub>2</sub>. We could not detect association of PtdIns5P or PtdIns(3,4,5)P<sub>3</sub> sensors with clathrin-coated structures, but we cannot rule out that lack of association was due to the low affinity of the relevant sensor for these lipids<sup>21,22</sup>, rather than to their absence from the coated structures. We did not test for PtdIns(3,5)P<sub>2</sub>, as there is no identified lipid binding domain specific for this headgroup<sup>23</sup>.

## Roles of phosphatidylinositol 4-kinase PI4KIII $\alpha$ and type I phosphatidylinositol 4-phosphate 5-kinase PIPKI $\gamma$ and inositol 5-phosphatases synaptojanin1 and OCRL

The plasma membrane phosphatidylinositol 4-kinase, PI4KIII $\alpha$ , converts phosphatidylinositol to PtdIns4P<sup>24</sup>. We treated cells for 10 min with the selective PI4KIII $\alpha$  inhibitor A1 (100 nM)<sup>25</sup>, and confirmed an increase in the number of coated pits with longer lifetimes (Extended Data Fig. 6a), as first shown in mouse embryonic cells constitutively lacking PI4KIII $\alpha$ <sup>24</sup>. We detected a substantial reduction in the steady PtdIns4P sensor accumulation during pit formation but a somewhat increased subsequent burst (Fig. 3a) for which we presently do not have an explanation, and confirmed the reversibility of A1 inhibition (Extended Data Fig. 6b). Previous reports have shown that acute inhibition of PtdIns4P synthesis has only a minor effect on the amount of PtdIns(4,5)P<sub>2</sub> associated with the plasma membrane<sup>24-26</sup>; consistent with these observations, the PtdIns(4,5)P<sub>2</sub> sensor was still recruited in the presence of the A1 inhibitor (Extended Data Fig. 6c). We conclude that the PI4KIII $\alpha$  catalyzed reaction is a source of PtdIns4P in a nascent coated pit but not a principal generator of the PtdIns4P burst that follows budding of a coated vesicle. PIPKI $\gamma$  is known to convert PtdIns4P into PtdIns(4,5)P<sub>2</sub><sup>27</sup> and its depletion by siRNA led to a ~30% reduction in the recruitment of the PtdIns(4,5)P<sub>2</sub> sensor to forming coated pits (Extended Data Fig. 6d); this observation suggests that PIPKI $\gamma$  might be partially responsible for the presence of PtdIns(4,5)P<sub>2</sub> in coated pits located at the plasma membrane.

Another potential route to PtdIns4P is the reaction catalyzed by 5-phosphatases such as synaptojanin1 (Synj1), which can interact with clathrin coat components<sup>28-30</sup> and associates with clathrin-derived structures at the plasma membrane<sup>31,32</sup>, or OCRL, which also associates with clathrin-derived structures at the plasma membrane and peripheral early endosomes when ectopically expressed as an EGFP fusion<sup>18,33,34</sup>. EGFP-Synj1 expressed in gene-edited EGFP-Synj1<sup>+/+</sup> SUM159 cells (Extended Data Fig. 6e) was also recruited to clathrin-coated pits and vesicles (Extended Data Fig. 6f). We found, however, that single elimination of Synj1 by CRISPR/Cas9 mediated knockout in SUM159 cells (Extended Data Fig. 6g) or its partial knockdown mediated by lentivirus transduction using shRNA in either SUM159 or COS-7 cells (Extended Data Fig. 6h, i) affected neither the steady, low-level recruitment of the PtdIns4P sensor to assembling coated pits nor the final burst of recruitment to coated vesicles seen in control cells. The same was true for single knockout or knockdown of OCRL in SUM159 cells (Extended Data Fig. 7e, f) and knockdown in COS-7 cells (Extended Data Fig. 7g). Transient depletion of OCRL in SUM159 cells was accompanied by an increased level of Synj1 mRNA (Extended Data Fig. 7j). We further found that EGFP-OCRL expressed at physiological levels in gene-edited SUM159 EGFP-OCRL<sup>+/+</sup> cells was not present in clathrin-coated pits whereas 2–8 OCRL molecules were typically recruited to coated vesicles after

vesicle scission (Extended Data Fig. 7a–d). Single elimination of Synj1 minimally increased the recruitment of the PtdIns(4,5)P<sub>2</sub> sensor, while elimination of OCRL had no effect (Extended Data Fig. 7h).

Elimination of Synj1 together with ~80% depletion of OCRL (Synj1-KO + OCRL-KD) led to an increased amount of PtdIns(4,5)P<sub>2</sub> sensor during the late stages of pit formation and in the coated vesicles, together with a delayed release of the sensor during the uncoating process (Fig. 3b and Extended Data Fig. 7h). Consistent with the impaired dephosphorylation of PtdIns(4,5)P<sub>2</sub> observed with the combined removal of Synj1 and OCRL, we found a decrease in the burst of the PtdIns4P sensor at the time of uncoating (Fig. 3c). Thus, upon depletion of ~80% of OCRL, we expect an average recruitment of ~ one OCRL molecule / per clathrin-coated vesicle, still sufficient to generate a PtdIns4P burst during the uncoating stage. Assuming that the catalytic activity of OCRL is about one dephosphorylation event / 20 ms, and that a coated vesicles contains ~100–200 PtdIns(4,5)P<sub>2</sub> molecules, then PtdIns(4,5)P<sub>2</sub> would still be consumed, but at a slower rate, e.g. in ~3 sec. We note that the small amount of PtdIns4P detected during the coated pit phase remained unchanged (Fig. 3c); this result is consistent with the observation that most of PtdIns4P associated with coated pits comes from the plasma membrane pool generated by the kinase activity of PI4KIII $\alpha$ , as shown in Fig. 3a.

The combined removal of Synj1 and the substantial depletion of OCRL had no detectable effects on the dynamics of coated vesicle formation as assessed by the distribution of lifetimes (Extended Data Fig. 7h). This is the expected behavior since the observed reduced PtdIns4P burst was accompanied by a normal PtdIns3P burst (Extended Data Fig. 7i) (these are the lipids that cause the recruitment of auxilin1 and auxilin2/GAK in a burst that accompanies uncoating)<sup>15,16</sup>.

### **Roles of the class II phosphatidylinositol 3-kinase PI3K-C2 $\alpha$ and class III phosphatidylinositol 3-kinase Vps34 and 4-phosphatase INPP4A in generating PtdIns3P in clathrin-coated vesicles**

The class II phosphatidylinositol 3-kinase PI3K-C2 $\alpha$ , known to associate with clathrin-coated structures at the plasma membrane<sup>35–37</sup>, can generate PtdIns3P and PtdIns(3,4)P<sub>2</sub><sup>36,38</sup>. We studied recruitment of this enzyme to clathrin-coated pits and vesicles in EGFP-PI3K-C2 $\alpha$ <sup>+/-</sup> SUM159 cells gene-edited in a single allele to express EGFP-PI3K-C2 $\alpha$  (Extended Data Fig. 8a). As observed before when using ectopic expression<sup>35</sup>, the continuous recruitment of EGFP-PI3K-C2 $\alpha$  was congruent with the accumulation of clathrin throughout the clathrin cycle (Extended Data Fig. 8b, d). Subsequent EGFP-PI3K-C2 $\alpha$  loss paralleled the abrupt release of the clathrin coat during the uncoating step (Extended Data Fig. 8b, d). It is therefore unlikely that PI3K-C2 $\alpha$  generates the

PtdIns(3,4)P<sub>2</sub> that appears late in these vesicular carriers (Fig. 2d). EGFP-PI3K-C2 $\alpha$  was present during the appearance of the PtdIns3P burst, however, suggesting that it may have generated PtdIns3P from phosphatidylinositol (Extended Data Fig. 8c). Support for this hypothesis comes from the observation that reducing the availability of PI3K-C2 $\alpha$  by siRNA knockdown greatly reduced the amplitude of the PtdIns3P burst detected with the PtdIns3P sensor in SUM159 cells (Fig. 3d, Extended Data Fig. 8e, f) or in COS-7 cells (Extended Data Fig. 8i), while recruitment of the PtdIns(3,4)P<sub>2</sub> and PtdIns4P sensors was largely unaffected (Extended Data Fig. 8g-i).

The class III phosphatidylinositol 3-kinase Vps34 known to regulate steps associated with intracellular vesicular trafficking including autophagosome formation<sup>39</sup> uses phosphatidylinositol as a substrate to generate PtdIns3P<sup>40</sup>. Since the selective inhibitors PIK-III (5  $\mu$ M for 1 hour; Fig. 3e) or VPS34-IN1 (5  $\mu$ M for 1 hour; Extended Data Fig. 8j)<sup>41,42</sup> had minimal effects in the burst recruitment of the PtdIns3P sensor to endocytic coated vesicles, we infer that this kinase does not generate the PtdIns3P detected in the early steps of endocytosis.

Since INPP4A generates PtdIns3P from PtdIns(3,4)P<sub>2</sub><sup>43</sup> and coated vesicles contain PtdIns(3,4)P<sub>2</sub>, it is possible that the burst of PtdIns3P we observe after scission is in part due to INPP4A activity. Indeed, siRNA depletion of INPP4A led to significant reduction of in the amount of PtdIns3P in coated vesicles (Extended Data Fig. 8k). INPP4A depletion also led to stalling of a fraction of coated pits (Extended Data Fig. 8k) and to enlargement of the endosomes as shown before<sup>43</sup>.

### Rab5 recruitment

Because Rab5 is required for fusion with early endosomes, it was proposed that coated vesicles either carry Rab5 captured from the plasma membrane or acquire it en route to endosomes<sup>44-46</sup>. More recent work led to the proposal that hRME-6, a Rab5 guanine exchange factor (GEF), recruits Rab5 to clathrin-coated vesicles, and that Rab5 is required for uncoating<sup>47</sup>. But recruitment of Rab5 to coated pits or coated vesicles is at odds with the absence of all three Rab5 isoforms in coated vesicles analyzed by mass spectrometry<sup>48</sup>, with the incomplete effect on transferrin or EGF uptake following joint depletion of all three Rab5 isoforms<sup>49</sup>, with the absence of Rab5 in coated pits or coated vesicles (Fig. 4a, Extended Data Fig. 9) and with the absence of any effect on coated pit and coated vesicle assembly and disassembly dynamics (Extended Data Fig. 10c). We find instead that Rab5 appears in almost all endocytic carriers soon after they lose their clathrin coat and that its recruitment coincides with an abrupt increase in carrier motion. We further show that Rabex5 has a role in Rab5 recruitment to the endocytic carriers similar to that of hRME-6 and that Rab5 recruitment

becomes negligible if both are depleted (Extended Data Fig. 10c). Rab5 might itself recruit a motor, or a third component, linked to the presence of PtdIns(3,4)P<sub>2</sub>, might directly or indirectly recruit both. Either alternative is consistent with our experimental observation, that endocytic carriers recruit Rab5 before they fuse with early endosomes.

## References

- 1 Behnia, R. & Munro, S. Organelle identity and the signposts for membrane traffic. *Nature* **438**, 597-604 (2005).
- 2 De Matteis, M. A. & Godi, A. PI-loting membrane traffic. *Nat Cell Biol* **6**, 487-492 (2004).
- 3 Balla, T. Phosphoinositides: tiny lipids with giant impact on cell regulation. *Physiol Rev* **93**, 1019-1137 (2013).
- 4 Di Paolo, G. & De Camilli, P. Phosphoinositides in cell regulation and membrane dynamics. *Nature* **443**, 651-657 (2006).
- 5 Stack, J. H., DeWald, D. B., Takegawa, K. & Emr, S. D. Vesicle-mediated protein transport: regulatory interactions between the Vps15 protein kinase and the Vps34 PtdIns 3-kinase essential for protein sorting to the vacuole in yeast. *J Cell Biol* **129**, 321-334 (1995).
- 6 Stack, J. H. & Emr, S. D. Vps34p required for yeast vacuolar protein sorting is a multiple specificity kinase that exhibits both protein kinase and phosphatidylinositol-specific PI 3-kinase activities. *J Biol Chem* **269**, 31552-31562 (1994).
- 7 Beck, K. A. & Keen, J. H. Interaction of phosphoinositide cycle intermediates with the plasma membrane-associated clathrin assembly protein AP-2. *J Biol Chem* **266**, 4442-4447 (1991).
- 8 Zoncu, R. *et al.* Loss of endocytic clathrin-coated pits upon acute depletion of phosphatidylinositol 4,5-bisphosphate. *Proc Natl Acad Sci U S A* **104**, 3793-3798 (2007).
- 9 Abe, N., Inoue, T., Galvez, T., Klein, L. & Meyer, T. Dissecting the role of PtdIns(4,5)P<sub>2</sub> in endocytosis and recycling of the transferrin receptor. *J Cell Sci* **121**, 1488-1494 (2008).
- 10 Salim, K. *et al.* Distinct specificity in the recognition of phosphoinositides by the pleckstrin homology domains of dynamin and Bruton's tyrosine kinase. *EMBO J* **15**, 6241-6250 (1996).
- 11 Zheng, J. *et al.* Identification of the binding site for acidic phospholipids on the pH domain of dynamin: implications for stimulation of GTPase activity. *J Mol Biol* **255**, 14-21 (1996).
- 12 Itoh, T. *et al.* Role of the ENTH domain in phosphatidylinositol-4,5-bisphosphate binding and endocytosis. *Science* **291**, 1047-1051 (2001).
- 13 Jovic, M., Kieken, F., Naslavsky, N., Sorgen, P. L. & Caplan, S. Eps15 homology domain 1-associated tubules contain phosphatidylinositol-4-phosphate and phosphatidylinositol-(4,5)-bisphosphate and are required for efficient recycling. *Mol Biol Cell* **20**, 2731-2743 (2009).
- 14 Yarar, D., Surka, M. C., Leonard, M. C. & Schmid, S. L. SNX9 activities are regulated by multiple phosphoinositides through both PX and BAR domains. *Traffic* **9**, 133-146 (2008).
- 15 Lee, D. W., Wu, X., Eisenberg, E. & Greene, L. E. Recruitment dynamics of GAK and auxilin to clathrin-coated pits during endocytosis. *J Cell Sci* **119**, 3502-3512 (2006).
- 16 Massol, R. H., Boll, W., Griffin, A. M. & Kirchhausen, T. A burst of auxilin recruitment determines the onset of clathrin-coated vesicle uncoating. *Proc Natl Acad Sci U S A* **103**, 10265-10270 (2006).
- 17 Guan, R., Dai, H., Harrison, S. C. & Kirchhausen, T. Structure of the PTEN-like region of auxilin, a detector of clathrin-coated vesicle budding. *Structure* **18**, 1191-1198 (2010).
- 18 Nandez, R. *et al.* A role of OCRL in clathrin-coated pit dynamics and uncoating revealed by studies of Lowe syndrome cells. *Elife* **3**, e02975 (2014).
- 19 Suchy, S. F. & Nussbaum, R. L. The deficiency of PIP2 5-phosphatase in Lowe syndrome affects actin polymerization. *Am J Hum Genet* **71**, 1420-1427 (2002).
- 20 Yu, A., Xing, Y., Harrison, S. C. & Kirchhausen, T. Structural analysis of the interaction between Dishevelled2 and clathrin AP-2 adaptor, a critical step in noncanonical Wnt signaling. *Structure* **18**, 1311-1320 (2010).

- 21 Gozani, O. *et al.* The PHD finger of the chromatin-associated protein ING2 functions as a nuclear phosphoinositide receptor. *Cell* **114**, 99-111 (2003).
- 22 Varnai, P., Rother, K. I. & Balla, T. Phosphatidylinositol 3-kinase-dependent membrane association of the Bruton's tyrosine kinase pleckstrin homology domain visualized in single living cells. *J Biol Chem* **274**, 10983-10989 (1999).
- 23 Hammond, G. R., Takasuga, S., Sasaki, T. & Balla, T. The ML1Nx2 Phosphatidylinositol 3,5-Bisphosphate Probe Shows Poor Selectivity in Cells. *PLoS One* **10**, e0139957 (2015).
- 24 Nakatsu, F. *et al.* PtdIns4P synthesis by PI4KIIIalpha at the plasma membrane and its impact on plasma membrane identity. *J Cell Biol* **199**, 1003-1016 (2012).
- 25 Bojjireddy, N. *et al.* Pharmacological and genetic targeting of the PI4KA enzyme reveals its important role in maintaining plasma membrane phosphatidylinositol 4-phosphate and phosphatidylinositol 4,5-bisphosphate levels. *J Biol Chem* **289**, 6120-6132 (2014).
- 26 Hammond, G. R. *et al.* PI4P and PI(4,5)P2 are essential but independent lipid determinants of membrane identity. *Science* **337**, 727-730 (2012).
- 27 Thieman, J. R. *et al.* Clathrin regulates the association of PIPKlgamma661 with the AP-2 adaptor beta2 appendage. *J Biol Chem* **284**, 13924-13939 (2009).
- 28 Chi, Y. *et al.* Comparative mechanistic and substrate specificity study of inositol polyphosphate 5-phosphatase *Schizosaccharomyces pombe* Synaptojanin and SHIP2. *J Biol Chem* **279**, 44987-44995 (2004).
- 29 Haffner, C. *et al.* Synaptojanin 1: localization on coated endocytic intermediates in nerve terminals and interaction of its 170 kDa isoform with Eps15. *FEBS Lett* **419**, 175-180 (1997).
- 30 Haffner, C., Di Paolo, G., Rosenthal, J. A. & de Camilli, P. Direct interaction of the 170 kDa isoform of synaptojanin 1 with clathrin and with the clathrin adaptor AP-2. *Curr Biol* **10**, 471-474 (2000).
- 31 Perera, R. M., Zoncu, R., Lucast, L., De Camilli, P. & Toomre, D. Two synaptojanin 1 isoforms are recruited to clathrin-coated pits at different stages. *Proc Natl Acad Sci U S A* **103**, 19332-19337 (2006).
- 32 Antonescu, C. N., Aguet, F., Danuser, G. & Schmid, S. L. Phosphatidylinositol-(4,5)-bisphosphate regulates clathrin-coated pit initiation, stabilization, and size. *Mol Biol Cell* **22**, 2588-2600 (2011).
- 33 Erdmann, K. S. *et al.* A role of the Lowe syndrome protein OCRL in early steps of the endocytic pathway. *Dev Cell* **13**, 377-390 (2007).
- 34 Ungewickell, A., Ward, M. E., Ungewickell, E. & Majerus, P. W. The inositol polyphosphate 5-phosphatase Ocr1 associates with endosomes that are partially coated with clathrin. *Proc Natl Acad Sci U S A* **101**, 13501-13506 (2004).
- 35 Posor, Y. *et al.* Spatiotemporal control of endocytosis by phosphatidylinositol-3,4-bisphosphate. *Nature* **499**, 233-237 (2013).
- 36 Gaidarov, I., Smith, M. E., Domin, J. & Keen, J. H. The class II phosphoinositide 3-kinase C2alpha is activated by clathrin and regulates clathrin-mediated membrane trafficking. *Mol Cell* **7**, 443-449 (2001).
- 37 Domin, J., Gaidarov, I., Smith, M. E., Keen, J. H. & Waterfield, M. D. The class II phosphoinositide 3-kinase PI3K-C2alpha is concentrated in the trans-Golgi network and present in clathrin-coated vesicles. *J Biol Chem* **275**, 11943-11950 (2000).
- 38 Campa, C. C., Franco, I. & Hirsch, E. PI3K-C2alpha: One enzyme for two products coupling vesicle trafficking and signal transduction. *FEBS Lett* **589**, 1552-1558 (2015).
- 39 Kim, J. *et al.* Differential regulation of distinct Vps34 complexes by AMPK in nutrient stress and autophagy. *Cell* **152**, 290-303 (2013).
- 40 Schink, K. O., Raiborg, C. & Stenmark, H. Phosphatidylinositol 3-phosphate, a lipid that regulates membrane dynamics, protein sorting and cell signalling. *Bioessays* **35**, 900-912 (2013).
- 41 Dowdle, W. E. *et al.* Selective VPS34 inhibitor blocks autophagy and uncovers a role for NCOA4 in ferritin degradation and iron homeostasis in vivo. *Nat Cell Biol* **16**, 1069-1079 (2014).

- 42 Bago, R. *et al.* Characterization of VPS34-IN1, a selective inhibitor of Vps34, reveals that the phosphatidylinositol 3-phosphate-binding SGK3 protein kinase is a downstream target of class III phosphoinositide 3-kinase. *Biochem J* **463**, 413-427 (2014).
- 43 Ivetac, I. *et al.* The type Ialpha inositol polyphosphate 4-phosphatase generates and terminates phosphoinositide 3-kinase signals on endosomes and the plasma membrane. *Mol Biol Cell* **16**, 2218-2233 (2005).
- 44 Villasenor, R., Kalaidzidis, Y. & Zerial, M. Signal processing by the endosomal system. *Curr Opin Cell Biol* **39**, 53-60 (2016).
- 45 Zoncu, R. *et al.* A phosphoinositide switch controls the maturation and signaling properties of APPL endosomes. *Cell* **136**, 1110-1121 (2009).
- 46 van der Bliek, A. M. A sixth sense for Rab5. *Nat Cell Biol* **7**, 548-550 (2005).
- 47 Semerdjieva, S. *et al.* Coordinated regulation of AP2 uncoating from clathrin-coated vesicles by rab5 and hRME-6. *J Cell Biol* **183**, 499-511 (2008).
- 48 Borner, G. H. *et al.* Multivariate proteomic profiling identifies novel accessory proteins of coated vesicles. *J Cell Biol* **197**, 141-160 (2012).
- 49 Huang, F., Khvorova, A., Marshall, W. & Sorkin, A. Analysis of clathrin-mediated endocytosis of epidermal growth factor receptor by RNA interference. *J Biol Chem* **279**, 16657-16661 (2004).
