# Supplementary material
Source: PubMed Central journal article supplement (PMC6263037)

**Supplemental Figure 1: uncropped gels**

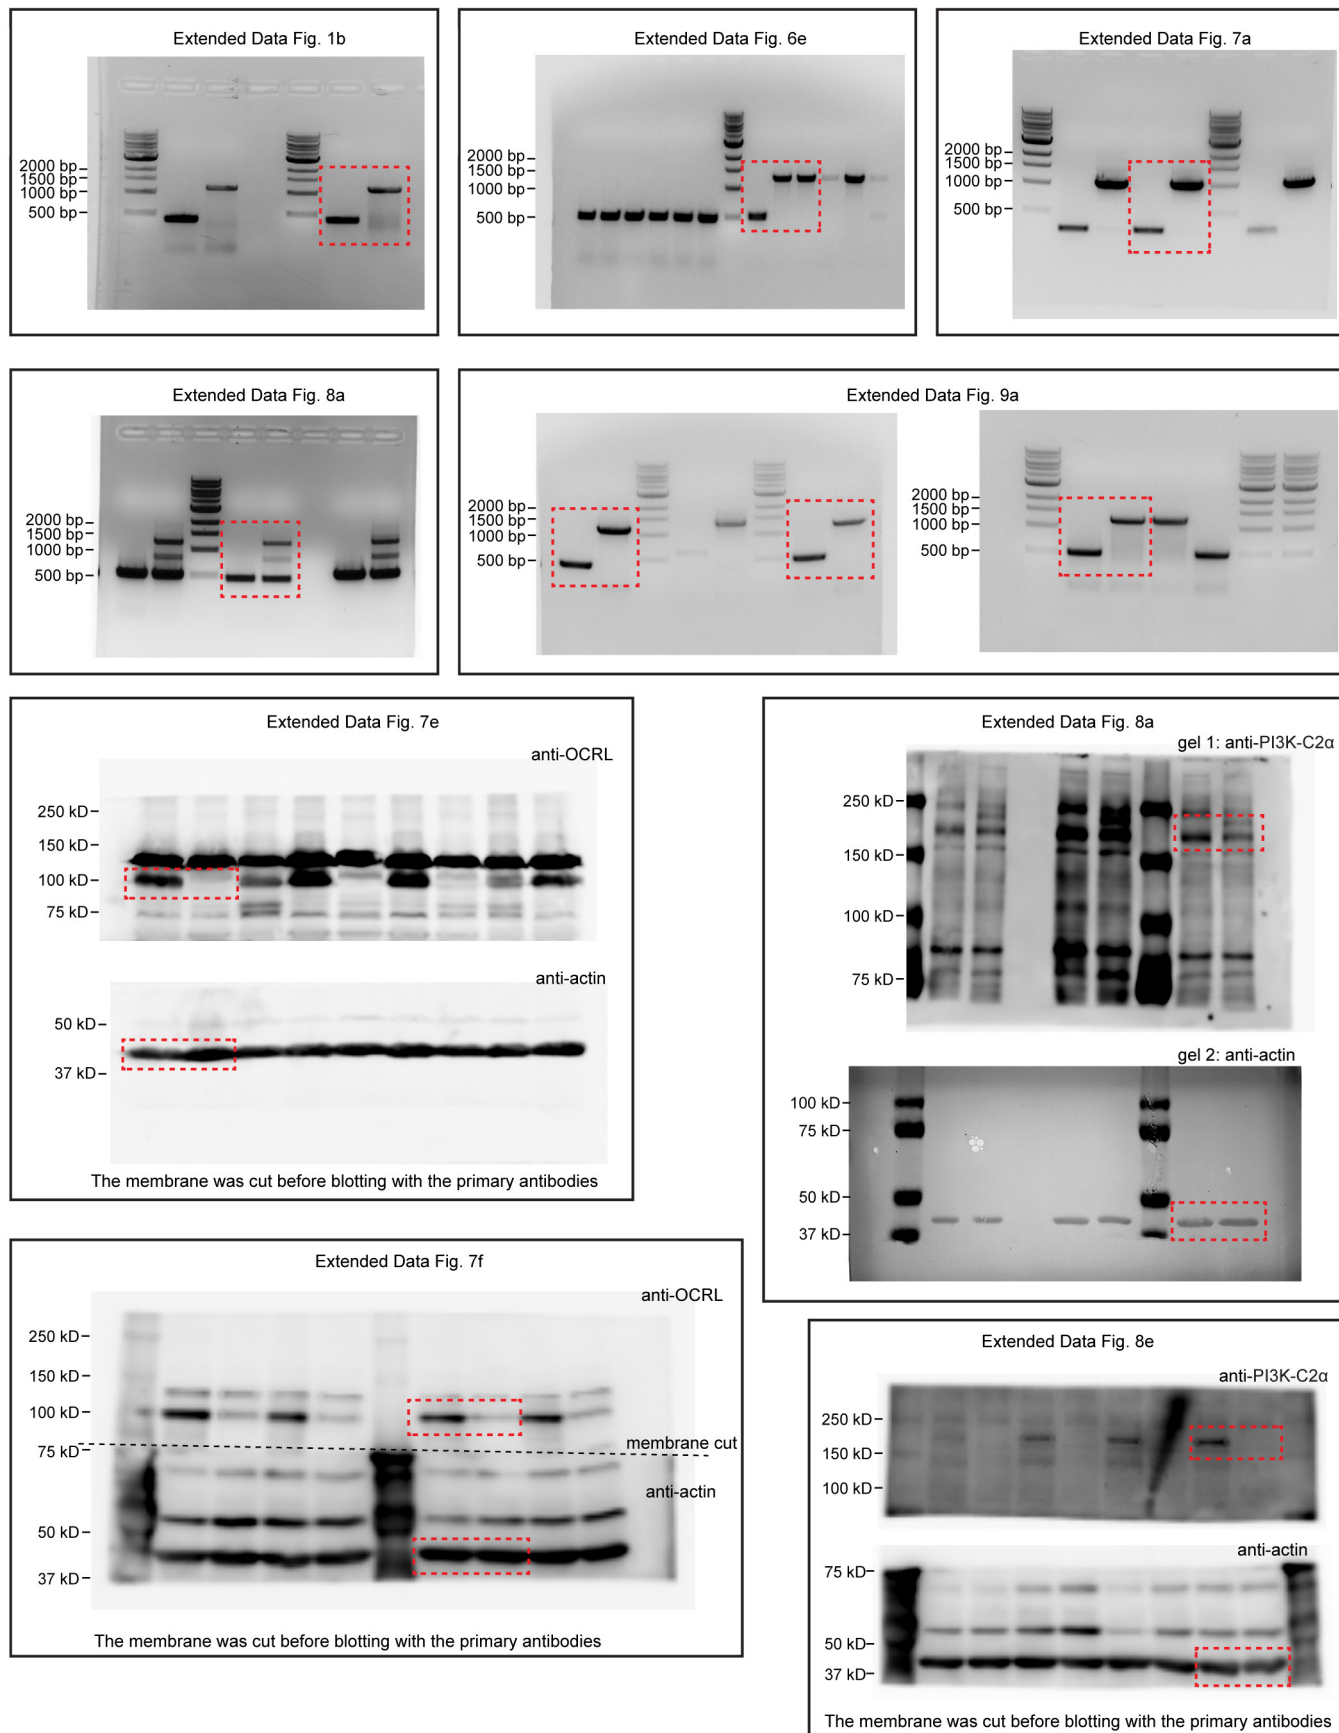

Supplement: NIHMS989091-supplement-Supp_Fig_1.pdf [file NIHMS989091-supplement-Supp_Fig_1.pdf]
